# Supplementary material for: Ionic scattering factors of atoms that compose biological molecules
Source: PubMed Central journal article supplement (PMC5929380; doi:10.1107/s2052252518005237), 2018-04-27
Supplement: m-05-00348-sup1.pdf [file m-05-00348-sup1.pdf]

# IUCrJ

**Volume 5 (2018)**

**Supporting information for article:**

**Ionic scattering factors of atoms that compose biological molecules**

**Koji Yonekura, Rei Matsuoka, Yoshiki Yamashita, Tsutomu Yamane, Mitsunori Ikeguchi, Akinori Kidera and Saori Maki-Yonekura**

## Supporting Information

### Ionic scattering factors of atoms that compose biological molecules

Koji Yonekura\*, Rei Matsuoka, Yoshiki Yamashita, Tsutomu Yamane,  
Mitsunori Ikeguchi, Akinori Kidera, and Saori Maki-Yonekura

\* To whom correspondence should be addressed.

E-mail: [yone@spring8.or.jp](mailto:yone@spring8.or.jp)

**Table S1.****X-ray scattering factors of ions**

| $\sin\theta/\lambda$<br>( $\text{\AA}^{-1}$ ) | C <sup>+</sup> | C <sup>-</sup> | N <sup>+</sup> | N <sup>-</sup> | O <sup>+</sup> | O <sup>-</sup> |
|-----------------------------------------------|----------------|----------------|----------------|----------------|----------------|----------------|
| 0.00                                          | 5.000e+0       | 7.000e+0       | 6.000e+0       | 8.000e+0       | 7.000e+0       | 9.000e+0       |
| 0.01                                          | 4.994e+0       | 6.978e+0       | 5.994e+0       | 7.983e+0       | 6.995e+0       | 8.986e+0       |
| 0.02                                          | 4.976e+0       | 6.914e+0       | 5.977e+0       | 7.933e+0       | 6.978e+0       | 8.945e+0       |
| 0.03                                          | 4.947e+0       | 6.812e+0       | 5.949e+0       | 7.852e+0       | 6.951e+0       | 8.878e+0       |
| 0.04                                          | 4.907e+0       | 6.675e+0       | 5.909e+0       | 7.742e+0       | 6.913e+0       | 8.785e+0       |
| 0.05                                          | 4.856e+0       | 6.511e+0       | 5.859e+0       | 7.607e+0       | 6.864e+0       | 8.670e+0       |
| 0.06                                          | 4.794e+0       | 6.325e+0       | 5.798e+0       | 7.449e+0       | 6.806e+0       | 8.534e+0       |
| 0.07                                          | 4.724e+0       | 6.124e+0       | 5.729e+0       | 7.274e+0       | 6.738e+0       | 8.381e+0       |
| 0.08                                          | 4.645e+0       | 5.912e+0       | 5.650e+0       | 7.084e+0       | 6.662e+0       | 8.211e+0       |
| 0.09                                          | 4.559e+0       | 5.694e+0       | 5.563e+0       | 6.883e+0       | 6.577e+0       | 8.029e+0       |
| 0.10                                          | 4.465e+0       | 5.473e+0       | 5.468e+0       | 6.674e+0       | 6.484e+0       | 7.836e+0       |
| 0.11                                          | 4.367e+0       | 5.253e+0       | 5.367e+0       | 6.460e+0       | 6.383e+0       | 7.636e+0       |
| 0.12                                          | 4.263e+0       | 5.037e+0       | 5.261e+0       | 6.244e+0       | 6.277e+0       | 7.429e+0       |
| 0.13                                          | 4.156e+0       | 4.824e+0       | 5.149e+0       | 6.028e+0       | 6.164e+0       | 7.218e+0       |
| 0.14                                          | 4.047e+0       | 4.619e+0       | 5.033e+0       | 5.813e+0       | 6.047e+0       | 7.006e+0       |
| 0.15                                          | 3.935e+0       | 4.420e+0       | 4.913e+0       | 5.601e+0       | 5.925e+0       | 6.793e+0       |
| 0.16                                          | 3.823e+0       | 4.230e+0       | 4.792e+0       | 5.393e+0       | 5.800e+0       | 6.580e+0       |
| 0.17                                          | 3.710e+0       | 4.049e+0       | 4.668e+0       | 5.191e+0       | 5.671e+0       | 6.369e+0       |
| 0.18                                          | 3.598e+0       | 3.876e+0       | 4.544e+0       | 4.994e+0       | 5.540e+0       | 6.161e+0       |
| 0.19                                          | 3.488e+0       | 3.712e+0       | 4.419e+0       | 4.803e+0       | 5.408e+0       | 5.957e+0       |
| 0.20                                          | 3.379e+0       | 3.558e+0       | 4.294e+0       | 4.620e+0       | 5.275e+0       | 5.757e+0       |
| 0.22                                          | 3.169e+0       | 3.275e+0       | 4.048e+0       | 4.274e+0       | 5.007e+0       | 5.372e+0       |
| 0.24                                          | 2.973e+0       | 3.026e+0       | 3.810e+0       | 3.958e+0       | 4.742e+0       | 5.010e+0       |
| 0.25                                          | 2.880e+0       | 2.914e+0       | 3.695e+0       | 3.811e+0       | 4.612e+0       | 4.838e+0       |
| 0.26                                          | 2.791e+0       | 2.810e+0       | 3.583e+0       | 3.671e+0       | 4.483e+0       | 4.672e+0       |
| 0.28                                          | 2.625e+0       | 2.622e+0       | 3.368e+0       | 3.413e+0       | 4.232e+0       | 4.358e+0       |
| 0.30                                          | 2.476e+0       | 2.459e+0       | 3.168e+0       | 3.182e+0       | 3.993e+0       | 4.070e+0       |
| 0.32                                          | 2.343e+0       | 2.320e+0       | 2.983e+0       | 2.976e+0       | 3.766e+0       | 3.806e+0       |
| 0.34                                          | 2.225e+0       | 2.200e+0       | 2.814e+0       | 2.794e+0       | 3.553e+0       | 3.565e+0       |
| 0.35                                          | 2.172e+0       | 2.147e+0       | 2.736e+0       | 2.710e+0       | 3.452e+0       | 3.453e+0       |
| 0.36                                          | 2.122e+0       | 2.097e+0       | 2.660e+0       | 2.632e+0       | 3.354e+0       | 3.347e+0       |
| 0.38                                          | 2.031e+0       | 2.009e+0       | 2.522e+0       | 2.490e+0       | 3.170e+0       | 3.149e+0       |
| 0.40                                          | 1.952e+0       | 1.934e+0       | 2.397e+0       | 2.364e+0       | 3.000e+0       | 2.970e+0       |
| 0.42                                          | 1.884e+0       | 1.869e+0       | 2.285e+0       | 2.253e+0       | 2.844e+0       | 2.809e+0       |
| 0.44                                          | 1.824e+0       | 1.812e+0       | 2.185e+0       | 2.156e+0       | 2.701e+0       | 2.665e+0       |
| 0.45                                          | 1.797e+0       | 1.787e+0       | 2.140e+0       | 2.112e+0       | 2.635e+0       | 2.598e+0       |
| 0.46                                          | 1.771e+0       | 1.763e+0       | 2.097e+0       | 2.071e+0       | 2.572e+0       | 2.535e+0       |
| 0.48                                          | 1.726e+0       | 1.720e+0       | 2.018e+0       | 1.996e+0       | 2.454e+0       | 2.419e+0       |
| 0.50                                          | 1.685e+0       | 1.682e+0       | 1.948e+0       | 1.929e+0       | 2.348e+0       | 2.314e+0       |
| 0.55                                          | 1.602e+0       | 1.603e+0       | 1.806e+0       | 1.795e+0       | 2.125e+0       | 2.099e+0       |

---

|      |          |          |          |          |          |          |
|------|----------|----------|----------|----------|----------|----------|
| 0.60 | 1.536e+0 | 1.538e+0 | 1.699e+0 | 1.694e+0 | 1.953e+0 | 1.935e+0 |
| 0.65 | 1.479e+0 | 1.480e+0 | 1.617e+0 | 1.615e+0 | 1.820e+0 | 1.809e+0 |
| 0.70 | 1.426e+0 | 1.426e+0 | 1.551e+0 | 1.551e+0 | 1.717e+0 | 1.711e+0 |
| 0.80 | 1.325e+0 | 1.322e+0 | 1.445e+0 | 1.446e+0 | 1.569e+0 | 1.568e+0 |
| 0.90 | 1.224e+0 | 1.217e+0 | 1.355e+0 | 1.353e+0 | 1.464e+0 | 1.464e+0 |
| 1.00 | 1.121e+0 | 1.112e+0 | 1.268e+0 | 1.264e+0 | 1.378e+0 | 1.377e+0 |
| 1.10 | 1.019e+0 | 1.009e+0 | 1.181e+0 | 1.175e+0 | 1.300e+0 | 1.298e+0 |
| 1.20 | 9.206e-1 | 9.110e-1 | 1.095e+0 | 1.088e+0 | 1.224e+0 | 1.220e+0 |
| 1.30 | 8.282e-1 | 8.189e-1 | 1.009e+0 | 1.002e+0 | 1.149e+0 | 1.144e+0 |
| 1.40 | 7.425e-1 | 7.338e-1 | 9.268e-1 | 9.190e-1 | 1.075e+0 | 1.069e+0 |
| 1.50 | 6.642e-1 | 6.561e-1 | 8.480e-1 | 8.403e-1 | 1.001e+0 | 9.950e-1 |
| 1.60 | 5.933e-1 | 5.859e-1 | 7.738e-1 | 7.664e-1 | 9.302e-1 | 9.237e-1 |
| 1.70 | 5.295e-1 | 5.229e-1 | 7.047e-1 | 6.977e-1 | 8.618e-1 | 8.552e-1 |
| 1.80 | 4.725e-1 | 4.666e-1 | 6.408e-1 | 6.342e-1 | 7.966e-1 | 7.902e-1 |
| 1.90 | 4.217e-1 | 4.164e-1 | 5.821e-1 | 5.760e-1 | 7.350e-1 | 7.289e-1 |
| 2.00 | 3.767e-1 | 3.719e-1 | 5.285e-1 | 5.229e-1 | 6.773e-1 | 6.715e-1 |
| 2.50 | 2.176e-1 | 2.149e-1 | 3.266e-1 | 3.232e-1 | 4.457e-1 | 4.417e-1 |
| 3.00 | 1.306e-1 | 1.290e-1 | 2.056e-1 | 2.035e-1 | 2.941e-1 | 2.914e-1 |
| 3.50 | 8.158e-2 | 8.062e-2 | 1.331e-1 | 1.318e-1 | 1.972e-1 | 1.955e-1 |
| 4.00 | 5.298e-2 | 5.236e-2 | 8.877e-2 | 8.789e-2 | 1.351e-1 | 1.339e-1 |
| 5.00 | 2.470e-2 | 2.442e-2 | 4.291e-2 | 4.249e-2 | 6.778e-2 | 6.721e-2 |
| 6.00 | 1.285e-2 | 1.270e-2 | 2.282e-2 | 2.260e-2 | 3.691e-2 | 3.660e-2 |

---

| $\sin\theta/\lambda$ ( $\text{\AA}^{-1}$ ) | P <sup>+</sup> | P <sup>-</sup> | P <sup>2+</sup> | S <sup>+</sup> | S <sup>-</sup> | S <sup>2+</sup> | S <sup>3+</sup> |
|--------------------------------------------|----------------|----------------|-----------------|----------------|----------------|-----------------|-----------------|
| 0.00                                       | 1.400e+1       | 1.600e+1       | 1.300e+1        | 1.500e+1       | 1.700e+1       | 1.400e+1        | 1.300e+1        |
| 0.01                                       | 1.398e+1       | 1.596e+1       | 1.299e+1        | 1.498e+1       | 1.697e+1       | 1.399e+1        | 1.299e+1        |
| 0.02                                       | 1.394e+1       | 1.586e+1       | 1.296e+1        | 1.494e+1       | 1.687e+1       | 1.396e+1        | 1.297e+1        |
| 0.03                                       | 1.386e+1       | 1.568e+1       | 1.291e+1        | 1.486e+1       | 1.672e+1       | 1.390e+1        | 1.293e+1        |
| 0.04                                       | 1.376e+1       | 1.545e+1       | 1.284e+1        | 1.476e+1       | 1.651e+1       | 1.382e+1        | 1.288e+1        |
| 0.05                                       | 1.363e+1       | 1.517e+1       | 1.275e+1        | 1.462e+1       | 1.626e+1       | 1.373e+1        | 1.281e+1        |
| 0.06                                       | 1.347e+1       | 1.485e+1       | 1.264e+1        | 1.447e+1       | 1.596e+1       | 1.361e+1        | 1.273e+1        |
| 0.07                                       | 1.330e+1       | 1.451e+1       | 1.252e+1        | 1.429e+1       | 1.564e+1       | 1.348e+1        | 1.263e+1        |
| 0.08                                       | 1.310e+1       | 1.414e+1       | 1.238e+1        | 1.409e+1       | 1.529e+1       | 1.333e+1        | 1.253e+1        |
| 0.09                                       | 1.289e+1       | 1.377e+1       | 1.223e+1        | 1.387e+1       | 1.492e+1       | 1.317e+1        | 1.241e+1        |
| 0.10                                       | 1.267e+1       | 1.339e+1       | 1.207e+1        | 1.364e+1       | 1.454e+1       | 1.299e+1        | 1.228e+1        |
| 0.11                                       | 1.244e+1       | 1.302e+1       | 1.191e+1        | 1.339e+1       | 1.415e+1       | 1.281e+1        | 1.214e+1        |
| 0.12                                       | 1.220e+1       | 1.265e+1       | 1.173e+1        | 1.314e+1       | 1.377e+1       | 1.261e+1        | 1.200e+1        |
| 0.13                                       | 1.196e+1       | 1.230e+1       | 1.155e+1        | 1.288e+1       | 1.339e+1       | 1.241e+1        | 1.185e+1        |
| 0.14                                       | 1.171e+1       | 1.196e+1       | 1.136e+1        | 1.261e+1       | 1.302e+1       | 1.220e+1        | 1.169e+1        |
| 0.15                                       | 1.147e+1       | 1.164e+1       | 1.117e+1        | 1.235e+1       | 1.266e+1       | 1.199e+1        | 1.153e+1        |
| 0.16                                       | 1.123e+1       | 1.133e+1       | 1.098e+1        | 1.208e+1       | 1.231e+1       | 1.177e+1        | 1.136e+1        |
| 0.17                                       | 1.099e+1       | 1.104e+1       | 1.079e+1        | 1.182e+1       | 1.198e+1       | 1.156e+1        | 1.120e+1        |
| 0.18                                       | 1.076e+1       | 1.077e+1       | 1.061e+1        | 1.156e+1       | 1.166e+1       | 1.134e+1        | 1.103e+1        |
| 0.19                                       | 1.054e+1       | 1.051e+1       | 1.042e+1        | 1.131e+1       | 1.136e+1       | 1.113e+1        | 1.086e+1        |
| 0.20                                       | 1.033e+1       | 1.027e+1       | 1.024e+1        | 1.106e+1       | 1.107e+1       | 1.092e+1        | 1.069e+1        |
| 0.22                                       | 9.923e+0       | 9.836e+0       | 9.889e+0        | 1.060e+1       | 1.054e+1       | 1.052e+1        | 1.035e+1        |
| 0.24                                       | 9.554e+0       | 9.457e+0       | 9.557e+0        | 1.016e+1       | 1.008e+1       | 1.013e+1        | 1.003e+1        |
| 0.25                                       | 9.383e+0       | 9.286e+0       | 9.399e+0        | 9.961e+0       | 9.869e+0       | 9.947e+0        | 9.869e+0        |
| 0.26                                       | 9.220e+0       | 9.125e+0       | 9.247e+0        | 9.768e+0       | 9.671e+0       | 9.770e+0        | 9.714e+0        |
| 0.28                                       | 8.918e+0       | 8.833e+0       | 8.959e+0        | 9.411e+0       | 9.313e+0       | 9.435e+0        | 9.415e+0        |
| 0.30                                       | 8.644e+0       | 8.573e+0       | 8.690e+0        | 9.088e+0       | 8.997e+0       | 9.126e+0        | 9.134e+0        |
| 0.32                                       | 8.394e+0       | 8.338e+0       | 8.441e+0        | 8.798e+0       | 8.717e+0       | 8.843e+0        | 8.868e+0        |
| 0.34                                       | 8.164e+0       | 8.122e+0       | 8.208e+0        | 8.536e+0       | 8.468e+0       | 8.582e+0        | 8.619e+0        |
| 0.35                                       | 8.056e+0       | 8.020e+0       | 8.097e+0        | 8.414e+0       | 8.353e+0       | 8.460e+0        | 8.500e+0        |
| 0.36                                       | 7.951e+0       | 7.921e+0       | 7.989e+0        | 8.298e+0       | 8.243e+0       | 8.342e+0        | 8.385e+0        |
| 0.38                                       | 7.750e+0       | 7.730e+0       | 7.781e+0        | 8.080e+0       | 8.038e+0       | 8.120e+0        | 8.164e+0        |
| 0.40                                       | 7.558e+0       | 7.547e+0       | 7.583e+0        | 7.878e+0       | 7.848e+0       | 7.913e+0        | 7.956e+0        |
| 0.42                                       | 7.373e+0       | 7.370e+0       | 7.391e+0        | 7.690e+0       | 7.670e+0       | 7.719e+0        | 7.758e+0        |
| 0.44                                       | 7.193e+0       | 7.195e+0       | 7.206e+0        | 7.512e+0       | 7.500e+0       | 7.535e+0        | 7.570e+0        |
| 0.45                                       | 7.104e+0       | 7.109e+0       | 7.114e+0        | 7.426e+0       | 7.418e+0       | 7.447e+0        | 7.479e+0        |
| 0.46                                       | 7.016e+0       | 7.022e+0       | 7.024e+0        | 7.342e+0       | 7.337e+0       | 7.360e+0        | 7.389e+0        |
| 0.48                                       | 6.842e+0       | 6.851e+0       | 6.846e+0        | 7.178e+0       | 7.178e+0       | 7.190e+0        | 7.214e+0        |
| 0.50                                       | 6.670e+0       | 6.680e+0       | 6.669e+0        | 7.018e+0       | 7.022e+0       | 7.026e+0        | 7.043e+0        |
| 0.55                                       | 6.243e+0       | 6.255e+0       | 6.237e+0        | 6.629e+0       | 6.639e+0       | 6.628e+0        | 6.633e+0        |
| 0.60                                       | 5.822e+0       | 5.834e+0       | 5.813e+0        | 6.247e+0       | 6.259e+0       | 6.241e+0        | 6.238e+0        |
| 0.65                                       | 5.411e+0       | 5.420e+0       | 5.401e+0        | 5.870e+0       | 5.882e+0       | 5.861e+0        | 5.852e+0        |
| 0.70                                       | 5.014e+0       | 5.021e+0       | 5.004e+0        | 5.498e+0       | 5.508e+0       | 5.488e+0        | 5.476e+0        |
| 0.80                                       | 4.280e+0       | 4.284e+0       | 4.271e+0        | 4.784e+0       | 4.791e+0       | 4.775e+0        | 4.761e+0        |

---

|      |          |          |          |          |          |          |          |
|------|----------|----------|----------|----------|----------|----------|----------|
| 0.90 | 3.646e+0 | 3.648e+0 | 3.639e+0 | 4.134e+0 | 4.138e+0 | 4.126e+0 | 4.113e+0 |
| 1.00 | 3.120e+0 | 3.122e+0 | 3.114e+0 | 3.567e+0 | 3.570e+0 | 3.560e+0 | 3.550e+0 |
| 1.10 | 2.696e+0 | 2.698e+0 | 2.692e+0 | 3.089e+0 | 3.091e+0 | 3.084e+0 | 3.075e+0 |
| 1.20 | 2.362e+0 | 2.364e+0 | 2.359e+0 | 2.697e+0 | 2.699e+0 | 2.693e+0 | 2.686e+0 |
| 1.30 | 2.102e+0 | 2.104e+0 | 2.100e+0 | 2.382e+0 | 2.383e+0 | 2.378e+0 | 2.373e+0 |
| 1.40 | 1.901e+0 | 1.903e+0 | 1.899e+0 | 2.131e+0 | 2.133e+0 | 2.128e+0 | 2.124e+0 |
| 1.50 | 1.746e+0 | 1.747e+0 | 1.744e+0 | 1.933e+0 | 1.935e+0 | 1.931e+0 | 1.928e+0 |
| 1.60 | 1.625e+0 | 1.626e+0 | 1.624e+0 | 1.778e+0 | 1.779e+0 | 1.776e+0 | 1.773e+0 |
| 1.70 | 1.530e+0 | 1.530e+0 | 1.529e+0 | 1.654e+0 | 1.656e+0 | 1.653e+0 | 1.651e+0 |
| 1.80 | 1.452e+0 | 1.453e+0 | 1.452e+0 | 1.556e+0 | 1.557e+0 | 1.555e+0 | 1.554e+0 |
| 1.90 | 1.388e+0 | 1.389e+0 | 1.388e+0 | 1.476e+0 | 1.477e+0 | 1.476e+0 | 1.475e+0 |
| 2.00 | 1.333e+0 | 1.334e+0 | 1.333e+0 | 1.410e+0 | 1.411e+0 | 1.410e+0 | 1.409e+0 |
| 2.50 | 1.123e+0 | 1.122e+0 | 1.123e+0 | 1.183e+0 | 1.182e+0 | 1.183e+0 | 1.184e+0 |
| 3.00 | 9.429e-1 | 9.420e-1 | 9.437e-1 | 1.010e+0 | 1.009e+0 | 1.010e+0 | 1.011e+0 |
| 3.50 | 7.777e-1 | 7.769e-1 | 7.785e-1 | 8.500e-1 | 8.491e-1 | 8.507e-1 | 8.517e-1 |
| 4.00 | 6.326e-1 | 6.319e-1 | 6.332e-1 | 7.052e-1 | 7.044e-1 | 7.059e-1 | 7.067e-1 |
| 5.00 | 4.112e-1 | 4.107e-1 | 4.116e-1 | 4.738e-1 | 4.733e-1 | 4.743e-1 | 4.748e-1 |
| 6.00 | 2.678e-1 | 2.675e-1 | 2.681e-1 | 3.165e-1 | 3.161e-1 | 3.168e-1 | 3.171e-1 |

---

**Table S2.****Electron scattering factors of ions**

| $\sin\theta/\lambda$ ( $\text{\AA}^{-1}$ ) | H <sup>+</sup> | C <sup>+</sup> | C <sup>-</sup> | N <sup>+</sup> | N <sup>-</sup> | O <sup>+</sup> | O <sup>-</sup> |
|--------------------------------------------|----------------|----------------|----------------|----------------|----------------|----------------|----------------|
| 0.04                                       | 1.496e+1       | 1.635e+1       | -1.010e+1      | 1.632e+1       | -1.110e+1      | 1.626e+1       | -1.175e+1      |
| 0.05                                       | 9.573e+0       | 1.096e+1       | -4.893e+0      | 1.093e+1       | -5.809e+0      | 1.087e+1       | -6.416e+0      |
| 0.06                                       | 6.648e+0       | 8.015e+0       | -2.163e+0      | 7.988e+0       | -2.988e+0      | 7.937e+0       | -3.553e+0      |
| 0.07                                       | 4.884e+0       | 6.233e+0       | -6.052e-1      | 6.210e+0       | -1.337e+0      | 6.162e+0       | -1.859e+0      |
| 0.08                                       | 3.740e+0       | 5.067e+0       | 3.298e-1       | 5.049e+0       | -3.130e-1      | 5.005e+0       | -7.902e-1      |
| 0.09                                       | 2.955e+0       | 4.259e+0       | 9.050e-1       | 4.247e+0       | 3.466e-1       | 4.206e+0       | -8.569e-2      |
| 0.10                                       | 2.393e+0       | 3.673e+0       | 1.261e+0       | 3.666e+0       | 7.802e-1       | 3.630e+0       | 3.916e-1       |
| 0.11                                       | 1.978e+0       | 3.231e+0       | 1.477e+0       | 3.229e+0       | 1.067e+0       | 3.198e+0       | 7.208e-1       |
| 0.12                                       | 1.662e+0       | 2.886e+0       | 1.601e+0       | 2.891e+0       | 1.256e+0       | 2.864e+0       | 9.489e-1       |
| 0.13                                       | 1.416e+0       | 2.611e+0       | 1.665e+0       | 2.622e+0       | 1.377e+0       | 2.600e+0       | 1.107e+0       |
| 0.14                                       | 1.221e+0       | 2.385e+0       | 1.687e+0       | 2.402e+0       | 1.449e+0       | 2.385e+0       | 1.214e+0       |
| 0.15                                       | 1.064e+0       | 2.197e+0       | 1.680e+0       | 2.220e+0       | 1.488e+0       | 2.207e+0       | 1.284e+0       |
| 0.16                                       | 9.349e-1       | 2.036e+0       | 1.655e+0       | 2.065e+0       | 1.502e+0       | 2.057e+0       | 1.328e+0       |
| 0.17                                       | 8.282e-1       | 1.896e+0       | 1.616e+0       | 1.931e+0       | 1.498e+0       | 1.929e+0       | 1.351e+0       |
| 0.18                                       | 7.387e-1       | 1.774e+0       | 1.569e+0       | 1.815e+0       | 1.482e+0       | 1.817e+0       | 1.358e+0       |
| 0.19                                       | 6.630e-1       | 1.666e+0       | 1.517e+0       | 1.711e+0       | 1.456e+0       | 1.718e+0       | 1.354e+0       |
| 0.20                                       | 5.983e-1       | 1.568e+0       | 1.461e+0       | 1.619e+0       | 1.424e+0       | 1.631e+0       | 1.342e+0       |
| 0.22                                       | 4.945e-1       | 1.400e+0       | 1.348e+0       | 1.460e+0       | 1.348e+0       | 1.480e+0       | 1.299e+0       |
| 0.24                                       | 4.155e-1       | 1.258e+0       | 1.236e+0       | 1.325e+0       | 1.264e+0       | 1.354e+0       | 1.242e+0       |
| 0.25                                       | 3.829e-1       | 1.195e+0       | 1.182e+0       | 1.266e+0       | 1.221e+0       | 1.298e+0       | 1.211e+0       |
| 0.26                                       | 3.540e-1       | 1.136e+0       | 1.130e+0       | 1.210e+0       | 1.178e+0       | 1.245e+0       | 1.178e+0       |
| 0.28                                       | 3.053e-1       | 1.030e+0       | 1.031e+0       | 1.109e+0       | 1.095e+0       | 1.150e+0       | 1.112e+0       |
| 0.30                                       | 2.659e-1       | 9.371e-1       | 9.416e-1       | 1.019e+0       | 1.015e+0       | 1.066e+0       | 1.045e+0       |
| 0.32                                       | 2.337e-1       | 8.547e-1       | 8.602e-1       | 9.388e-1       | 9.404e-1       | 9.896e-1       | 9.802e-1       |
| 0.34                                       | 2.070e-1       | 7.815e-1       | 7.867e-1       | 8.666e-1       | 8.709e-1       | 9.207e-1       | 9.181e-1       |
| 0.35                                       | 1.954e-1       | 7.479e-1       | 7.528e-1       | 8.332e-1       | 8.381e-1       | 8.886e-1       | 8.883e-1       |
| 0.36                                       | 1.847e-1       | 7.162e-1       | 7.207e-1       | 8.014e-1       | 8.066e-1       | 8.580e-1       | 8.593e-1       |
| 0.38                                       | 1.657e-1       | 6.578e-1       | 6.614e-1       | 7.423e-1       | 7.476e-1       | 8.006e-1       | 8.040e-1       |
| 0.40                                       | 1.496e-1       | 6.055e-1       | 6.082e-1       | 6.886e-1       | 6.935e-1       | 7.480e-1       | 7.524e-1       |
| 0.42                                       | 1.357e-1       | 5.585e-1       | 5.605e-1       | 6.398e-1       | 6.440e-1       | 6.996e-1       | 7.042e-1       |
| 0.44                                       | 1.236e-1       | 5.163e-1       | 5.177e-1       | 5.952e-1       | 5.988e-1       | 6.550e-1       | 6.595e-1       |
| 0.45                                       | 1.182e-1       | 4.968e-1       | 4.979e-1       | 5.745e-1       | 5.777e-1       | 6.341e-1       | 6.384e-1       |
| 0.46                                       | 1.131e-1       | 4.783e-1       | 4.792e-1       | 5.546e-1       | 5.575e-1       | 6.140e-1       | 6.181e-1       |
| 0.48                                       | 1.039e-1       | 4.440e-1       | 4.446e-1       | 5.175e-1       | 5.199e-1       | 5.761e-1       | 5.798e-1       |
| 0.50                                       | 9.573e-2       | 4.131e-1       | 4.134e-1       | 4.836e-1       | 4.855e-1       | 5.411e-1       | 5.443e-1       |
| 0.55                                       | 7.912e-2       | 3.480e-1       | 3.479e-1       | 4.110e-1       | 4.118e-1       | 4.649e-1       | 4.669e-1       |
| 0.60                                       | 6.648e-2       | 2.968e-1       | 2.967e-1       | 3.524e-1       | 3.528e-1       | 4.020e-1       | 4.032e-1       |
| 0.65                                       | 5.665e-2       | 2.561e-1       | 2.560e-1       | 3.049e-1       | 3.050e-1       | 3.501e-1       | 3.507e-1       |
| 0.70                                       | 4.884e-2       | 2.234e-1       | 2.234e-1       | 2.662e-1       | 2.662e-1       | 3.069e-1       | 3.072e-1       |
| 0.80                                       | 3.740e-2       | 1.748e-1       | 1.749e-1       | 2.077e-1       | 2.077e-1       | 2.405e-1       | 2.405e-1       |

---

|      |          |          |          |          |          |          |          |
|------|----------|----------|----------|----------|----------|----------|----------|
| 0.90 | 2.955e-2 | 1.411e-1 | 1.413e-1 | 1.668e-1 | 1.669e-1 | 1.931e-1 | 1.931e-1 |
| 1.00 | 2.393e-2 | 1.168e-1 | 1.170e-1 | 1.372e-1 | 1.373e-1 | 1.585e-1 | 1.585e-1 |
| 1.10 | 1.978e-2 | 9.853e-2 | 9.872e-2 | 1.151e-1 | 1.152e-1 | 1.325e-1 | 1.326e-1 |
| 1.20 | 1.662e-2 | 8.442e-2 | 8.458e-2 | 9.815e-2 | 9.827e-2 | 1.126e-1 | 1.127e-1 |
| 1.30 | 1.416e-2 | 7.324e-2 | 7.337e-2 | 8.484e-2 | 8.495e-2 | 9.702e-2 | 9.710e-2 |
| 1.40 | 1.221e-2 | 6.420e-2 | 6.431e-2 | 7.416e-2 | 7.426e-2 | 8.457e-2 | 8.464e-2 |
| 1.50 | 1.064e-2 | 5.676e-2 | 5.684e-2 | 6.544e-2 | 6.552e-2 | 7.445e-2 | 7.451e-2 |
| 1.60 | 9.349e-3 | 5.055e-2 | 5.062e-2 | 5.821e-2 | 5.828e-2 | 6.610e-2 | 6.616e-2 |
| 1.70 | 8.282e-3 | 4.530e-2 | 4.536e-2 | 5.214e-2 | 5.219e-2 | 5.912e-2 | 5.917e-2 |
| 1.80 | 7.387e-3 | 4.083e-2 | 4.088e-2 | 4.698e-2 | 4.702e-2 | 5.321e-2 | 5.326e-2 |
| 1.90 | 6.630e-3 | 3.698e-2 | 3.702e-2 | 4.255e-2 | 4.259e-2 | 4.817e-2 | 4.821e-2 |
| 2.00 | 5.983e-3 | 3.365e-2 | 3.368e-2 | 3.872e-2 | 3.876e-2 | 4.381e-2 | 4.385e-2 |
| 2.50 | 3.829e-3 | 2.214e-2 | 2.215e-2 | 2.556e-2 | 2.557e-2 | 2.893e-2 | 2.894e-2 |
| 3.00 | 2.659e-3 | 1.561e-2 | 1.561e-2 | 1.807e-2 | 1.807e-2 | 2.049e-2 | 2.050e-2 |
| 3.50 | 1.954e-3 | 1.156e-2 | 1.157e-2 | 1.342e-2 | 1.342e-2 | 1.524e-2 | 1.525e-2 |
| 4.00 | 1.496e-3 | 8.896e-3 | 8.897e-3 | 1.034e-2 | 1.034e-2 | 1.176e-2 | 1.177e-2 |
| 5.00 | 9.573e-4 | 5.720e-3 | 5.721e-3 | 6.660e-3 | 6.661e-3 | 7.594e-3 | 7.594e-3 |
| 6.00 | 6.648e-4 | 3.980e-3 | 3.980e-3 | 4.639e-3 | 4.639e-3 | 5.294e-3 | 5.294e-3 |

---



| $\sin\theta/\lambda$ ( $\text{\AA}^{-1}$ ) | P <sup>+</sup> | P <sup>-</sup> | P <sup>2+</sup> | S <sup>+</sup> | S <sup>-</sup> | S <sup>2+</sup> | S <sup>3+</sup> |
|--------------------------------------------|----------------|----------------|-----------------|----------------|----------------|-----------------|-----------------|
| 0.04                                       | 1.856e+1       | -6.746e+0      | 3.236e+1        | 1.859e+1       | -7.689e+0      | 3.253e+1        | 4.672e+1        |
| 0.05                                       | 1.313e+1       | -1.627e+0      | 2.156e+1        | 1.316e+1       | -2.489e+0      | 2.175e+1        | 3.055e+1        |
| 0.06                                       | 1.015e+1       | 9.839e-1       | 1.568e+1        | 1.019e+1       | 2.327e-1       | 1.587e+1        | 2.176e+1        |
| 0.07                                       | 8.313e+0       | 2.413e+0       | 1.211e+1        | 8.362e+0       | 1.768e+0       | 1.230e+1        | 1.645e+1        |
| 0.08                                       | 7.094e+0       | 3.209e+0       | 9.783e+0        | 7.154e+0       | 2.666e+0       | 9.977e+0        | 1.299e+1        |
| 0.09                                       | 6.226e+0       | 3.637e+0       | 8.170e+0        | 6.297e+0       | 3.200e+0       | 8.365e+0        | 1.061e+1        |
| 0.10                                       | 5.577e+0       | 3.849e+0       | 7.001e+0        | 5.658e+0       | 3.499e+0       | 7.197e+0        | 8.903e+0        |
| 0.11                                       | 5.068e+0       | 3.918e+0       | 6.120e+0        | 5.159e+0       | 3.653e+0       | 6.316e+0        | 7.629e+0        |
| 0.12                                       | 4.655e+0       | 3.899e+0       | 5.435e+0        | 4.757e+0       | 3.708e+0       | 5.633e+0        | 6.652e+0        |
| 0.13                                       | 4.309e+0       | 3.822e+0       | 4.889e+0        | 4.423e+0       | 3.696e+0       | 5.087e+0        | 5.881e+0        |
| 0.14                                       | 4.014e+0       | 3.711e+0       | 4.442e+0        | 4.136e+0       | 3.641e+0       | 4.640e+0        | 5.263e+0        |
| 0.15                                       | 3.755e+0       | 3.577e+0       | 4.071e+0        | 3.886e+0       | 3.556e+0       | 4.269e+0        | 4.757e+0        |
| 0.16                                       | 3.525e+0       | 3.431e+0       | 3.755e+0        | 3.663e+0       | 3.450e+0       | 3.952e+0        | 4.335e+0        |
| 0.17                                       | 3.318e+0       | 3.280e+0       | 3.482e+0        | 3.462e+0       | 3.332e+0       | 3.679e+0        | 3.979e+0        |
| 0.18                                       | 3.129e+0       | 3.128e+0       | 3.245e+0        | 3.279e+0       | 3.207e+0       | 3.439e+0        | 3.674e+0        |
| 0.19                                       | 2.956e+0       | 2.977e+0       | 3.035e+0        | 3.111e+0       | 3.080e+0       | 3.227e+0        | 3.410e+0        |
| 0.20                                       | 2.796e+0       | 2.830e+0       | 2.848e+0        | 2.954e+0       | 2.950e+0       | 3.038e+0        | 3.178e+0        |
| 0.22                                       | 2.511e+0       | 2.554e+0       | 2.527e+0        | 2.673e+0       | 2.698e+0       | 2.712e+0        | 2.792e+0        |
| 0.24                                       | 2.263e+0       | 2.303e+0       | 2.262e+0        | 2.425e+0       | 2.460e+0       | 2.439e+0        | 2.482e+0        |
| 0.25                                       | 2.151e+0       | 2.188e+0       | 2.145e+0        | 2.313e+0       | 2.348e+0       | 2.318e+0        | 2.348e+0        |
| 0.26                                       | 2.046e+0       | 2.080e+0       | 2.037e+0        | 2.206e+0       | 2.241e+0       | 2.206e+0        | 2.226e+0        |
| 0.28                                       | 1.857e+0       | 1.883e+0       | 1.844e+0        | 2.012e+0       | 2.041e+0       | 2.004e+0        | 2.010e+0        |
| 0.30                                       | 1.690e+0       | 1.709e+0       | 1.678e+0        | 1.838e+0       | 1.862e+0       | 1.828e+0        | 1.826e+0        |
| 0.32                                       | 1.544e+0       | 1.557e+0       | 1.533e+0        | 1.683e+0       | 1.702e+0       | 1.673e+0        | 1.667e+0        |
| 0.34                                       | 1.415e+0       | 1.424e+0       | 1.406e+0        | 1.545e+0       | 1.559e+0       | 1.536e+0        | 1.528e+0        |
| 0.35                                       | 1.357e+0       | 1.364e+0       | 1.349e+0        | 1.482e+0       | 1.494e+0       | 1.473e+0        | 1.465e+0        |
| 0.36                                       | 1.302e+0       | 1.307e+0       | 1.295e+0        | 1.422e+0       | 1.432e+0       | 1.414e+0        | 1.406e+0        |
| 0.38                                       | 1.202e+0       | 1.205e+0       | 1.196e+0        | 1.313e+0       | 1.320e+0       | 1.306e+0        | 1.299e+0        |
| 0.40                                       | 1.113e+0       | 1.115e+0       | 1.109e+0        | 1.215e+0       | 1.219e+0       | 1.210e+0        | 1.203e+0        |
| 0.42                                       | 1.035e+0       | 1.035e+0       | 1.032e+0        | 1.127e+0       | 1.130e+0       | 1.124e+0        | 1.118e+0        |
| 0.44                                       | 9.651e-1       | 9.649e-1       | 9.636e-1        | 1.049e+0       | 1.051e+0       | 1.046e+0        | 1.042e+0        |
| 0.45                                       | 9.332e-1       | 9.327e-1       | 9.320e-1        | 1.013e+0       | 1.014e+0       | 1.011e+0        | 1.007e+0        |
| 0.46                                       | 9.030e-1       | 9.023e-1       | 9.021e-1        | 9.793e-1       | 9.799e-1       | 9.773e-1        | 9.740e-1        |
| 0.48                                       | 8.474e-1       | 8.465e-1       | 8.471e-1        | 9.164e-1       | 9.164e-1       | 9.152e-1        | 9.127e-1        |
| 0.50                                       | 7.975e-1       | 7.965e-1       | 7.975e-1        | 8.599e-1       | 8.595e-1       | 8.592e-1        | 8.574e-1        |
| 0.55                                       | 6.928e-1       | 6.919e-1       | 6.934e-1        | 7.415e-1       | 7.407e-1       | 7.415e-1        | 7.411e-1        |
| 0.60                                       | 6.101e-1       | 6.094e-1       | 6.108e-1        | 6.484e-1       | 6.476e-1       | 6.488e-1        | 6.490e-1        |
| 0.65                                       | 5.432e-1       | 5.427e-1       | 5.438e-1        | 5.738e-1       | 5.732e-1       | 5.743e-1        | 5.748e-1        |
| 0.70                                       | 4.878e-1       | 4.874e-1       | 4.883e-1        | 5.129e-1       | 5.124e-1       | 5.134e-1        | 5.140e-1        |
| 0.80                                       | 4.009e-1       | 4.007e-1       | 4.012e-1        | 4.194e-1       | 4.192e-1       | 4.198e-1        | 4.203e-1        |
| 0.90                                       | 3.355e-1       | 3.354e-1       | 3.357e-1        | 3.506e-1       | 3.505e-1       | 3.508e-1        | 3.512e-1        |
| 1.00                                       | 2.843e-1       | 2.843e-1       | 2.845e-1        | 2.976e-1       | 2.975e-1       | 2.977e-1        | 2.980e-1        |
| 1.10                                       | 2.434e-1       | 2.433e-1       | 2.435e-1        | 2.554e-1       | 2.553e-1       | 2.555e-1        | 2.556e-1        |
| 1.20                                       | 2.100e-1       | 2.100e-1       | 2.101e-1        | 2.211e-1       | 2.211e-1       | 2.212e-1        | 2.213e-1        |

---

|      |          |          |          |          |          |          |          |
|------|----------|----------|----------|----------|----------|----------|----------|
| 1.30 | 1.827e-1 | 1.826e-1 | 1.827e-1 | 1.929e-1 | 1.928e-1 | 1.929e-1 | 1.930e-1 |
| 1.40 | 1.599e-1 | 1.599e-1 | 1.600e-1 | 1.694e-1 | 1.693e-1 | 1.694e-1 | 1.694e-1 |
| 1.50 | 1.410e-1 | 1.410e-1 | 1.410e-1 | 1.496e-1 | 1.496e-1 | 1.497e-1 | 1.497e-1 |
| 1.60 | 1.250e-1 | 1.250e-1 | 1.251e-1 | 1.330e-1 | 1.330e-1 | 1.330e-1 | 1.330e-1 |
| 1.70 | 1.116e-1 | 1.115e-1 | 1.116e-1 | 1.188e-1 | 1.188e-1 | 1.188e-1 | 1.188e-1 |
| 1.80 | 1.001e-1 | 1.001e-1 | 1.001e-1 | 1.067e-1 | 1.067e-1 | 1.067e-1 | 1.067e-1 |
| 1.90 | 9.024e-2 | 9.024e-2 | 9.025e-2 | 9.629e-2 | 9.628e-2 | 9.629e-2 | 9.630e-2 |
| 2.00 | 8.177e-2 | 8.177e-2 | 8.177e-2 | 8.730e-2 | 8.729e-2 | 8.730e-2 | 8.730e-2 |
| 2.50 | 5.314e-2 | 5.314e-2 | 5.314e-2 | 5.674e-2 | 5.674e-2 | 5.674e-2 | 5.674e-2 |
| 3.00 | 3.738e-2 | 3.738e-2 | 3.738e-2 | 3.986e-2 | 3.987e-2 | 3.986e-2 | 3.986e-2 |
| 3.50 | 2.779e-2 | 2.779e-2 | 2.779e-2 | 2.960e-2 | 2.960e-2 | 2.960e-2 | 2.960e-2 |
| 4.00 | 2.149e-2 | 2.149e-2 | 2.149e-2 | 2.288e-2 | 2.288e-2 | 2.288e-2 | 2.288e-2 |
| 5.00 | 1.397e-2 | 1.397e-2 | 1.397e-2 | 1.486e-2 | 1.486e-2 | 1.486e-2 | 1.486e-2 |
| 6.00 | 9.794e-3 | 9.795e-3 | 9.794e-3 | 1.043e-2 | 1.043e-2 | 1.043e-2 | 1.043e-2 |

---

**Table 2.****Parameterization of X-ray scattering factors of ions for the 4 Gaussians + a constant model**

| ion             | a <sub>1</sub> | a <sub>2</sub> | a <sub>3</sub> | a <sub>4</sub> | c         | R <sub>scat</sub> <sup>*</sup><br>(%) |
|-----------------|----------------|----------------|----------------|----------------|-----------|---------------------------------------|
|                 | b <sub>1</sub> | b <sub>2</sub> | b <sub>3</sub> | b <sub>4</sub> |           |                                       |
| C <sup>+</sup>  | 6.727e+0       | 1.439e+0       | 2.191e+0       | 9.913e-1       | -6.349e+0 | 0.0154                                |
|                 | 4.479e-3       | 6.231e-1       | 1.313e+1       | 2.971e+1       |           |                                       |
| C <sup>-</sup>  | 1.598e+0       | 2.161e+0       | 2.360e+0       | 6.549e-1       | 2.238e-1  | 0.0606                                |
|                 | 5.843e-1       | 1.346e+1       | 3.831e+1       | 1.405e+2       |           |                                       |
| N <sup>+</sup>  | 1.570e+0       | 2.068e+0       | 1.847e+0       | 2.870e-1       | 2.271e-1  | 0.0025                                |
|                 | 4.122e-1       | 8.064e+0       | 1.665e+1       | 3.340e+1       |           |                                       |
| N <sup>-</sup>  | 1.569e+0       | 2.640e+0       | 2.795e+0       | 7.386e-1       | 2.551e-1  | 0.0394                                |
|                 | 4.393e-1       | 9.202e+0       | 2.624e+1       | 9.062e+1       |           |                                       |
| O <sup>+</sup>  | 1.553e+0       | 2.237e+0       | 2.466e+0       | 5.079e-1       | 2.367e-1  | 0.0015                                |
|                 | 3.148e-1       | 5.618e+0       | 1.191e+1       | 2.504e+1       |           |                                       |
| O <sup>-</sup>  | 1.535e+0       | 3.038e+0       | 3.280e+0       | 8.555e-1       | 2.886e-1  | 0.0346                                |
|                 | 3.459e-1       | 6.556e+0       | 1.876e+1       | 6.328e+1       |           |                                       |
| P <sup>+</sup>  | 1.732e+0       | 6.472e+0       | 3.698e+0       | 9.940e-1       | 1.105e+0  | 0.0065                                |
|                 | 5.089e-1       | 1.893e+0       | 2.424e+1       | 5.215e+1       |           |                                       |
| P <sup>-</sup>  | 1.990e+0       | 6.243e+0       | 4.686e+0       | 1.928e+0       | 1.146e+0  | 0.0423                                |
|                 | 5.903e-1       | 1.967e+0       | 3.046e+1       | 1.031e+2       |           |                                       |
| P <sup>2+</sup> | 1.825e+0       | 6.368e+0       | 3.076e+0       | 6.076e-1       | 1.124e+0  | 0.0046                                |
|                 | 5.431e-1       | 1.924e+0       | 2.114e+1       | 4.185e+1       |           |                                       |
| S <sup>+</sup>  | 1.419e+0       | 6.923e+0       | 4.736e+0       | 1.076e+0       | 8.458e-1  | 0.0115                                |
|                 | 2.405e-1       | 1.459e+0       | 2.028e+1       | 4.519e+1       |           |                                       |
| S <sup>-</sup>  | 1.505e+0       | 6.721e+0       | 5.614e+0       | 2.130e+0       | 1.024e+0  | 0.0372                                |
|                 | 3.506e-1       | 1.507e+0       | 2.411e+1       | 7.728e+1       |           |                                       |
| S <sup>2+</sup> | 1.442e+0       | 6.787e+0       | 4.206e+0       | 5.939e-1       | 9.715e-1  | 0.0092                                |
|                 | 3.088e-1       | 1.488e+0       | 1.846e+1       | 3.950e+1       |           |                                       |
| S <sup>3+</sup> | 1.611e+0       | 6.550e+0       | 3.434e+0       | 3.284e-1       | 1.078e+0  | 0.0051                                |
|                 | 4.062e-1       | 1.543e+0       | 1.637e+1       | 3.422e+1       |           |                                       |

\* Defined in equation (6). Calculated between the scattering factors and the fitted curves. Summation over data from  $\sin \theta / \lambda = 0$  to  $2 \text{ \AA}^{-1}$ .

**Table 3.****Parameterization of X-ray scattering factors of ions for the 5 Gaussians + a constant model**

| ion             | a <sub>1</sub> | a <sub>2</sub> | a <sub>3</sub> | a <sub>4</sub> | a <sub>5</sub> | c         | R <sub>scat</sub> <sup>*</sup> |
|-----------------|----------------|----------------|----------------|----------------|----------------|-----------|--------------------------------|
|                 | b <sub>1</sub> | b <sub>2</sub> | b <sub>3</sub> | b <sub>4</sub> | b <sub>5</sub> |           | (%)                            |
| C <sup>+</sup>  | 8.431e-2       | 5.957e-1       | 1.145e+0       | 2.224e+0       | 9.528e-1       | -2.457e-3 | 0.0194                         |
|                 | 4.787e-2       | 2.273e-1       | 7.042e-1       | 1.328e+1       | 3.012e+1       |           |                                |
| C <sup>-</sup>  | 5.946e-1       | 1.229e+0       | 2.295e+0       | 2.257e+0       | 6.050e-1       | 1.642e-2  | 0.0516                         |
|                 | 1.840e-1       | 7.149e-1       | 1.408e+1       | 4.041e+1       | 1.463e+2       |           |                                |
| N <sup>+</sup>  | 1.670e-1       | 6.515e-1       | 9.987e-1       | 2.749e+0       | 1.427e+0       | 5.943e-3  | 0.0228                         |
|                 | 6.426e-2       | 2.094e-1       | 5.482e-1       | 9.105e+0       | 2.215e+1       |           |                                |
| N <sup>-</sup>  | 6.423e-1       | 1.169e+0       | 2.685e+0       | 2.758e+0       | 7.215e-1       | 2.224e-2  | 0.0403                         |
|                 | 1.451e-1       | 5.304e-1       | 9.338e+0       | 2.664e+1       | 9.161e+1       |           |                                |
| O <sup>+</sup>  | 6.042e-1       | 1.171e+0       | 2.398e+0       | 2.376e+0       | 4.253e-1       | 2.527e-2  | 0.0047                         |
|                 | 1.078e-1       | 3.764e-1       | 5.797e+0       | 1.247e+1       | 2.613e+1       |           |                                |
| O <sup>-</sup>  | 6.950e-1       | 1.102e+0       | 3.023e+0       | 3.287e+0       | 8.611e-1       | 2.919e-2  | 0.0367                         |
|                 | 1.195e-1       | 4.139e-1       | 6.546e+0       | 1.869e+1       | 6.309e+1       |           |                                |
| P <sup>+</sup>  | 1.496e+0       | 1.992e+0       | 5.676e+0       | 3.739e+0       | 9.422e-1       | 1.546e-1  | 0.0107                         |
|                 | 7.120e-2       | 9.188e-1       | 1.987e+0       | 2.446e+1       | 5.304e+1       |           |                                |
| P <sup>-</sup>  | 1.505e+0       | 2.539e+0       | 5.185e+0       | 4.696e+0       | 1.909e+0       | 1.595e-1  | 0.0431                         |
|                 | 7.246e-2       | 1.008e+0       | 2.097e+0       | 3.061e+1       | 1.036e+2       |           |                                |
| P <sup>2+</sup> | 1.501e+0       | 2.253e+0       | 5.421e+0       | 3.145e+0       | 5.236e-1       | 1.563e-1  | 0.0084                         |
|                 | 7.155e-2       | 9.661e-1       | 2.041e+0       | 2.148e+1       | 4.363e+1       |           |                                |
| S <sup>+</sup>  | 1.477e+0       | 1.268e+0       | 6.299e+0       | 4.788e+0       | 1.011e+0       | 1.569e-1  | 0.0155                         |
|                 | 6.175e-2       | 6.681e-1       | 1.521e+0       | 2.047e+1       | 4.613e+1       |           |                                |
| S <sup>-</sup>  | 1.483e+0       | 1.597e+0       | 6.016e+0       | 5.623e+0       | 2.114e+0       | 1.610e-1  | 0.0397                         |
|                 | 6.259e-2       | 7.320e-1       | 1.570e+0       | 2.419e+1       | 7.758e+1       |           |                                |
| S <sup>2+</sup> | 1.483e+0       | 1.520e+0       | 6.052e+0       | 4.257e+0       | 5.300e-1       | 1.594e-1  | 0.0131                         |
|                 | 6.220e-2       | 7.229e-1       | 1.558e+0       | 1.865e+1       | 4.092e+1       |           |                                |
| S <sup>3+</sup> | 1.489e+0       | 1.983e+0       | 5.618e+0       | 3.476e+0       | 2.716e-1       | 1.626e-1  | 0.0084                         |
|                 | 6.277e-2       | 8.002e-1       | 1.631e+0       | 1.656e+1       | 3.620e+1       |           |                                |

\* Defined in equation (6). Calculated between the scattering factors and the fitted curves. Summation over data from  $\sin \theta / \lambda = 0$  to  $6 \text{ \AA}^{-1}$ .

**Table 4.****Parameterization of electron scattering factors of ions for the 5 Gaussians + a charge term model**

| ion             | a <sub>1</sub> | a <sub>2</sub> | a <sub>3</sub> | a <sub>4</sub> | a <sub>5</sub> | <i>R</i> <sub>scat</sub> <sup>*</sup><br>(%) |
|-----------------|----------------|----------------|----------------|----------------|----------------|----------------------------------------------|
|                 | b <sub>1</sub> | b <sub>2</sub> | b <sub>3</sub> | b <sub>4</sub> | b <sub>5</sub> |                                              |
| C <sup>+</sup>  | 2.079e-2       | 9.266e-2       | 2.949e-1       | 6.812e-1       | 3.304e-1       | 0.0156                                       |
|                 | 5.950e-2       | 5.359e-1       | 2.760e+0       | 9.283e+0       | 2.442e+1       |                                              |
| C <sup>-</sup>  | 2.248e-1       | 8.254e-1       | 1.769e+0       | 1.690e+0       | 6.994e-1       | 0.0810                                       |
|                 | 5.518e-1       | 4.308e+0       | 1.600e+1       | 5.196e+1       | 1.708e+2       |                                              |
| N <sup>+</sup>  | 2.296e-2       | 1.004e-1       | 3.289e-1       | 6.546e-1       | 2.733e-1       | 0.0132                                       |
|                 | 5.522e-2       | 4.910e-1       | 2.402e+0       | 7.751e+0       | 2.051e+1       |                                              |
| N <sup>-</sup>  | 2.192e-1       | 7.256e-1       | 1.398e+0       | 1.245e+0       | 4.381e-1       | 0.0430                                       |
|                 | 4.784e-1       | 3.389e+0       | 1.171e+1       | 3.604e+1       | 1.125e+2       |                                              |
| O <sup>+</sup>  | 2.439e-2       | 1.036e-1       | 3.360e-1       | 6.112e-1       | 2.447e-1       | 0.0120                                       |
|                 | 5.082e-2       | 4.390e-1       | 2.036e+0       | 6.407e+0       | 1.710e+1       |                                              |
| O <sup>-</sup>  | 2.236e-1       | 6.923e-1       | 1.176e+0       | 9.354e-1       | 2.821e-1       | 0.0218                                       |
|                 | 4.372e-1       | 2.918e+0       | 9.670e+0       | 2.868e+1       | 8.489e+1       |                                              |
| P <sup>+</sup>  | 6.191e-2       | 3.154e-1       | 6.324e-1       | 1.661e+0       | 1.027e+0       | 0.0447                                       |
|                 | 6.525e-2       | 6.224e-1       | 3.009e+0       | 1.258e+1       | 3.411e+1       |                                              |
| P <sup>-</sup>  | 4.590e-1       | 1.002e+0       | 2.724e+0       | 3.228e+0       | 1.336e+0       | 0.0728                                       |
|                 | 5.019e-1       | 3.545e+0       | 1.445e+1       | 4.313e+1       | 1.303e+2       |                                              |
| P <sup>2+</sup> | 4.997e-2       | 2.497e-1       | 4.690e-1       | 1.099e+0       | 6.144e-1       | 0.0233                                       |
|                 | 5.712e-2       | 5.372e-1       | 2.398e+0       | 1.051e+1       | 2.704e+1       |                                              |
| S <sup>+</sup>  | 6.232e-2       | 3.129e-1       | 6.541e-1       | 1.742e+0       | 9.377e-1       | 0.0391                                       |
|                 | 6.149e-2       | 5.785e-1       | 2.848e+0       | 1.107e+1       | 2.978e+1       |                                              |
| S <sup>-</sup>  | 4.496e-1       | 9.810e-1       | 2.598e+0       | 2.717e+0       | 8.614e-1       | 0.0543                                       |
|                 | 4.656e-1       | 3.259e+0       | 1.233e+1       | 3.583e+1       | 1.055e+2       |                                              |
| S <sup>2+</sup> | 5.029e-2       | 2.440e-1       | 4.671e-1       | 1.196e+0       | 7.100e-1       | 0.0230                                       |
|                 | 5.364e-2       | 4.908e-1       | 2.186e+0       | 8.911e+0       | 2.266e+1       |                                              |
| S <sup>3+</sup> | 3.991e-2       | 1.787e-1       | 3.465e-1       | 7.425e-1       | 5.600e-1       | 0.0124                                       |
|                 | 4.652e-2       | 4.001e-1       | 1.626e+0       | 6.936e+0       | 1.724e+1       |                                              |

\* Defined in equation (6). Calculated between the scattering factors and the fitted curves. Summation over data from  $\sin \theta/\lambda = 0.04$  to  $6 \text{ \AA}^{-1}$  for the positive ions and from  $0.04$  to  $1.5 \text{ \AA}^{-1}$  for the negative ions.
